1           **Stethoscope and non-infrared thermometer disinfection among**  
2           **physicians: A cross-sectional study with implications for the control**  
3           **of COVID-19**

4           **Biniyam Sahiledengle MPH<sup>a\*</sup>, Yohannes Tekalegn MPH<sup>a</sup>, Kebebe Bekele MD<sup>b</sup>, Abdi Tesemma MD<sup>b</sup>, Bruce**  
5           **John Edward Quisido BSN, MSN<sup>c</sup>**

6           <sup>a</sup>Madda Walabu University Goba Referral hospital, Department of Public Health, Bale-Goba, Ethiopia

7           <sup>b</sup>Madda Walabu University Goba Referral hospital, Department of Surgery, Bale-Goba, Ethiopia

8           <sup>c</sup>Madda Walabu University Goba Referral hospital, Department of Nursing, Bale-Goba, Ethiopia

9           **\*Correspondence:** Biniyam Sahiledengle, Public Health Department, Madda Walabu University Goba Referral  
10           hospital, School of Health Sciences, Bale-Goba, Ethiopia, P.o.box: 76; Tel.: +251 911 56 0309; e-mail:  
11           [biniyam.sahiledengle@gmail.com](mailto:biniyam.sahiledengle@gmail.com); **ORCID iD:** <https://orcid.org/0000-0002-1114-4849>

12

13 **Abstract**

14 **Background:** Stethoscopes and non-infrared thermometers are the customary medical equipment used by the  
15 physicians on a daily basis, among various patients. With the rise of potential infections in the healthcare facilities  
16 and the transmission nature of the current COVID-19 pandemic, consistent and correct disinfections of these  
17 devices after each use should not be pardoned. This study, therefore, describes the level of stethoscope and non-  
18 infrared thermometer disinfection practices among physicians working in healthcare facilities during the COVID-19  
19 pandemic.

20 **Methods:** An online survey was circulated using an anonymous and self-reporting questionnaire via Google  
21 form with a consent form appended to it.

22 **Results:** The proportion of stethoscope and non-Infrared thermometer disinfections after every use was 13.9%  
23 (95%CI: 10.9-17.6) and 20.4% (95%CI: 16.7-24.5), respectively. Taking COVID-19 training (AOR: 2.52; 95%CI:  
24 1.29-4.92) and the availability of stethoscope disinfection materials at the workplace (AOR: 3.03; 95% CI: 1.29-  
25 7.10) were significantly increased the odds of stethoscope disinfection after every use. The odds of stethoscope  
26 disinfection after every use was significantly decreased for those who reported the use of shared stethoscope  
27 (AOR: 0.34; 95% CI: 0.12-0.92).

28 **Conclusion:** Only a wee share of the respondents reported that they have disinfected their stethoscopes and  
29 non-infrared thermometers after every use – possibly jeopardizing both patients and clinicians safety, particularly  
30 during the COVID-19 pandemic.

31

32

33

## 34 BACKGROUND

35 Stethoscopes are the most customary medical equipment wield by physicians on a daily basis, among various  
36 patients. With the rise of potential infections in the healthcare setups, stethoscope disinfection should not be  
37 pardoned [1-4]. The Gold Standard is to disinfect stethoscopes after each contact with patients [5]. Current  
38 studies suggest that disinfecting stethoscopes between each patient contact using a 70% isopropyl alcohol swab  
39 or alcohol pad from the bell to the earpieces, including the tubing, is effective in eradicating bacteria including  
40 methicillin-resistant *Staphylococcus aureus* [6,7]. However, only a minority of healthcare workers regularly  
41 disinfect their stethoscopes [2,8,9].

42 It is well-documented that the stethoscopes can harbor pathogenic microorganisms [3,10-22]. Potential pathogens  
43 cultured from stethoscopes include *Pseudomonas aeruginosa* [3,9], *Clostridium Difficile* [11], methicillin-resistant  
44 *Staphylococcus aureus* (MRSA) [3,13-16], Vancomycin-resistant *enterococci* [3,18,19], and *Acinetobacter*  
45 *baumannii* [20]. Huang et al reported that highly resistant bacteria, MRSA can potentially linger up to 9 days on  
46 stethoscopes [23]. Additionally, a review by Wolfensberger et al found that the diaphragms of the stethoscopes  
47 become colonized by bacteria quickly; acquiring more pathogens than any part of the doctors' hands except the  
48 fingertips [24].

49 Assessing patients' body temperatures are one of the vital procedures in monitoring health conditions. In practice,  
50 patients' body temperatures are taken at least twice daily among hospitalized patients, and the common  
51 anatomical sites for measurements are oral, rectal, and axillary temperatures. In low-income settings, acquiring  
52 patients' body temperatures using non-infrared thermometers are still predominant practices, and these devices  
53 travel among healthcare workers across the hospital. This entails that non-infrared thermometers are often  
54 exposed to body fluids, and travel without proper disinfection may advance the spread of cross-infection [25-27].  
55 Rectal thermometers and reusable oral thermometers may possibly contact with body fluids, hence, wagger  
56 contaminations, and therefore are unsuitable in this travel fast COVID-19 pandemic situation [28]. Currently, non-  
57 contact infrared thermometer scans are preferable as they don't require direct contact with the skin, and thus,  
58 lead to efficiency, expediency, and lessening the risks of cross-contaminations.

59 The Center for Disease Control and Prevention (CDC) classify stethoscope as both non-critical and semi-critical  
60 medical devices – depending on the association it has with intact and non-intact skins [29]. To this day, the role of  
61 stethoscopes as disease transmitters have been debated, and ultimately, these medical devices should be  
62 considered risks as it comes into contact with both patients and healthcare providers [3, 30,31]. The analyses of  
63 22 studies reveal that Severe Acute Respiratory Syndrome (SARS) coronavirus, Middle East Respiratory  
64 Syndrome (MERS) coronavirus, or endemic human coronaviruses (HCoV) persist on inanimate surfaces like  
65 metals, glasses or plastics for up to 9 days [32]. This poses concerns among patients contracting COVID-19 from  
66 contaminated stethoscopes and non-infrared thermometers, even if this hasn't been directly documented yet – at  
67 least the theoretical risk of COVID-19 is anticipated to be existing, and just as same as how one cleans his hands  
68 regularly, cleaning anything that contacts the patients would be potentially beneficial to their safety – as evidence  
69 suggests that human-to-human transmission of novel human coronavirus and were explicated with incubation  
70 times, and its spread via droplets, contaminated hands or objects (such as medical equipments) [33].

71 In Ethiopia, physicians habitually carry their stethoscopes around their necks or in their pouches, and on  
72 occasions brings them to their homes, as well. These consequently augments the risk of transmission of  
73 infections from the hospitals to homes, and vice versa. Up to date, no specific guidelines have been available in  
74 the country solely on the disinfection of this medical equipment [34]. To our knowledge, there are no available  
75 studies on this aspect that determine the level of physician's stethoscopes and non-infrared thermometer  
76 disinfection at the national level. Consequently, the assessment of the current disinfection practices among  
77 physicians is essential. This study, therefore, describes the level of stethoscope and non-infrared thermometer  
78 disinfection practices among physicians and determine its associated factors during the COVID-19 pandemic.

## 79 **METHODS**

### 80 *Study Design and Setting*

81 This was a cross-sectional online survey conducted in Ethiopia from June 1 to 20, 2020 using Google form with a  
82 consent form appended to it. An internet-based survey was utilized due to the current COVID-19 pandemic and  
83 the government's strict regulations on face-to-face interviews in Ethiopia. Ethiopia is located in the horn of Africa.  
84 It is one in the world with low medical doctor densities (0.769/10,000 population), which is far below the minimum

85 threshold density. The number of physicians increased to 8,395 (in the year 2018) from a number of 1,936 in  
86 2003. Withal, there are 2,528 specialist medical practitioners in Ethiopia [35].

### 87 *Study Participants and Eligibility*

88 All medical – doctors, specialist medical practitioners, residents, and interns – who are able to access and utilize  
89 at least an Email, Facebook, LinkedIn, Telegram, and by Tweeter, who consented to participate, and those  
90 working in healthcare facilities were eligible in the survey. With exceptions, physicians who do not engage in  
91 direct contact with patients and those works in any administrative areas were excluded.

### 92 *Sample Size Determination*

93 The sample size was determined using Epi Info™ 7.1.1.14 statistical software (Center for Disease Control and  
94 Prevention, 2013) using single population proportion formula with the assumption of 95% confidence level, 5%  
95 precision, considering the proportion of healthcare workers who had safe stethoscope disinfection practice was  
96 39.7% [2], and considering 25% non-response rate. The calculated sample size was (n=460).

### 97 *Data Collection*

98 Data were collected via self-administered structured questionnaires. The study participants who were willing to  
99 partake in the present survey and could access the Google form link obtain an informed consent sheet as a pre-  
100 requirement before proceeding to participate in the actual survey. Explicit information about the aim, scope, and  
101 eligibility criteria along with the link was purveyed. The call for participation was dispatched thru Emails,  
102 Messenger, Tweeter, Linked In, and Telegram. Upon receiving the Google form link, the participants were auto  
103 directed to the information about informed consent and their voluntariness to participate.

### 104 *Instrument*

105 An internet-based, self-administered closed-ended questionnaire was utilized. The online data collection tools  
106 were created using the Google Forms provided by Google™ and were constructed using the English language.  
107 The tools consisted of four sections, with a total of 25 questions. The first section was analogous to the  
108 participants' socio-demographic characteristics – including age, gender, professional titles, working department,  
109 service year, type of healthcare facility, place of residence, and history of COVID-19-related training. The second  
110 section comprised of six questions relating to stethoscope disinfection practices during COVID-19 pandemic

111 (such as “Have you ever disinfected your stethoscope?”, “How often do you disinfect your stethoscope?”, “Which  
112 stethoscope part you frequently disinfect?”, and “Do you disinfect your stethoscope after examining your last  
113 patient?” along with questions about reasons for not disinfecting their stethoscopes. The third section of the  
114 questionnaire encompassed four questions pertaining to topics about non-infrared thermometer disinfections.  
115 Finally, the last section composed of five questions about the physicians’ awareness related to stethoscope and  
116 non-infrared thermometer disinfections. The data collection tool was tested for internal consistency and the  
117 resulting Cronbach’s Alpha value of 0.841 was obtained.

## 118 *Study Variables and Measurements*

### 119 *Dependent Variables*

120 In the physicians’ self-report regarding stethoscope and non-infrared thermometer disinfection practices,  
121 respondents were posed to specify their usual practices (during COVID-19 pandemic) by uttering to them “How  
122 often do you disinfect your stethoscope?”. Physicians who claimed that they have disinfected their stethoscopes  
123 after every use/after contact with patients were coded as “1” and labeled as “disinfection after every use”, if  
124 otherwise “0”. Similarly, physicians who have claimed that they have disinfected non-infrared thermometers after  
125 every use were coded as “1”, and zero, if otherwise.

### 126 *Independent Variables*

127 The independent variables include gender, age, years of service, type of healthcare facility, availability of  
128 reminders about medical equipment disinfections in their respective working units (e.g: poster), availability of  
129 disinfectant solutions in their working units, and awareness on stethoscope and non-infrared thermometer  
130 disinfections.

### 131 *Data Analysis*

132 Completed questionnaires were extracted from Google Forms in Excel spreads and were exported to STATA  
133 version 14.0 for the analyses. Descriptive statistics were employed to illustrate the data. Multiple binary logistic  
134 regression models were used to assess factors associated with the outcome variables (stethoscope and non-  
135 infrared thermometer disinfection after every use). All the independent variables were tested for potential  
136 multicollinearities before placing them in the multivariable logistic regression models. The multicollinearity effects

137 were assessed with a cut of off point of variation inflation factor (VIF) of greater than ten. Finally, significant  
138 variables were discerned based on the adjusted odds ratio (AOR) with 95% Confidence Intervals (CIs), and  
139 results were deemed significant if they reflect  $p < 0.05$ . To scrutinize the accuracy of the final formulated model,  
140 the Hosmer-Lemeshow test for the overall goodness of fit was used. Accordingly, the overall goodness of fit was  
141 0.799 and 0.163 for stethoscope and non-infrared thermometer disinfection after every use models, respectively.

#### 142 *Ethical approval and considerations*

143 The study was conducted according to the Declaration of Helsinki. Ethical approval was granted by the  
144 Institutional Review Board (IRB) at Madda Walabu University. The respondents penned the online questionnaires  
145 anonymously, voluntarily, and independently. The privacy and confidentiality of the study participants were also  
146 safeguarded throughout the data collection. An information letter was incorporated on the first page of every  
147 questionnaire which covered information about the study description, eligibility criteria, voluntary participation, and  
148 confidentiality. Also, the contact details of the investigators (name, phone number, email address, and their  
149 affiliations) for any inquiry were mounted on the top of the questionnaire. All participants were assumed to only  
150 proceed on the survey after reading the consent and acknowledging engagement. Accordingly, electronic  
151 informed consent was sought from the study participants as pre-requisites before they are able to annex the  
152 survey.

## 153 **RESULTS**

### 154 *Socio-Demographic Characteristics of the Study Participants*

155 A total of 422 (response rate of 91.7%) physicians filled the online forms. The study participants composed –  
156 62.8% medical doctors, 33.6% specialist medical practitioners, and 3.6% residents. Of these, 368 (87.20%) were  
157 males, 388 (91.94%) are currently working in governmental healthcare facilities, and 238 (56.40%) have less than  
158 3 years of work experience. The mean age of the study participants was 30.13 ( $\pm 4.34$ ) years (range: 22-55) and  
159 228 (54.03%) were in the age group of 26-30 (**Table I**).

### 160 **Stethoscope Disinfection**

161 As seen in **Table II**, the proportion of stethoscope disinfection after every use was 13.9% (95%CI: 10.9-17.6). A  
162 quarter of the physicians delineated that they never disinfected their stethoscopes. Fifty-four percent of them also  
163 reported spending only 20 or fewer seconds per stethoscope disinfection. The proportion of the physicians who  
164 reported about disinfecting the different parts of the stethoscope variegated as well (diaphragm, 39.51%;  
165 diaphragm, tubing, and earpieces, 28.40%; diaphragm and earpieces, 23.77%, earpieces, 7.72%; plastic tubing,  
166 0.62%). **Figure 1** exhibited the reported barriers to stethoscope disinfection. More than one third (35.9%) of the  
167 physicians outlined that they cried out for access to stethoscope disinfectants when needed. Factors, such as  
168 forgetfulness (29.3%) and negligence (25.2%) were the frequently cited barriers to such. Nevertheless,  
169 378(89.57%) of respondents believed that stethoscopes necessitated to be disinfected after every use.

### 170 171 *Factors associated with stethoscope disinfection after every use*

172 The odds ratios for a unit change on each covariate are delineated thru the binary logistic regression model in  
173 **Table III**. On fixed values of the other covariates, young physicians (age  $\leq 30$ ) nearly have three times more the  
174 odds of disinfection after every use than those of age greater than 30 (adjusted odds ratio [AOR], 2.52; 95%  
175 confidence interval [CI]: 1.10-5.78). Those who have had previous COVID-19 training preceding the survey had  
176 approximately three times favorable odds of disinfection after every use than those who have none (AOR: 2.52;  
177 95% CI: 1.29-4.92). In addition, the availability of stethoscope disinfectants at the workplace significantly  
178 increased the odds of disinfection after every use (AOR: 3.03; 95% CI: 1.29-7.10). Amid the participants,  
179 disinfection after every use was significantly greater among resident physicians compared to those of general  
180 practitioners (AOR: 4.61; 95%CI: 1.29-16.52). On the contrary, the odds of disinfection after every use were  
181 significantly lesser among those who reported using a shared stethoscope (AOR: 0.34; 95% CI: 0.12-0.92).

### 182 *Non-Infrared Thermometer Disinfection*

183 Three hundred sixty-six respondents, 86.73% concurred that the non-Infrared thermometers need to be  
184 disinfected after every use, to which 20.37% (95%CI: 16.78-24.51) reported on disinfecting succeeding every use,  
185 and two fifths (40.53%) of physicians sadly reported that they have never disinfected any thermometers (**Figure**  
186 **2**). In this study, 141 (33.41%) of the respondents reported that they have disinfected the non-Infrared  
187 thermometers the last time they used them (**Table A.1**).

188



189 *Factors Associated With Non-Infrared Thermometer Disinfection after Every Use*

190 In multivariable analyses, the odds of disinfection after every use were significantly higher among female  
191 physicians as compared to the males (AOR: 2.21; 95%CI: 1.21-4.36). Among the physicians, the odds of  
192 disinfection after every use were significantly higher in resident physicians (AOR: 7.10; 95% CI: 2.30-21.95) than  
193 those of general practitioners (**Table IV**).

194  
195 **DISCUSSION**

196  
197 In order to scrutinize on the stethoscope and non-infrared thermometer disinfections, an online survey was  
198 conducted. This is the pivotal study about stethoscopes and non-infrared thermometer disinfections executed  
199 among the physicians in Ethiopia, and one of the few in the age of COVID-19 pandemic. The present study also  
200 dispensed insights about factors associated with disinfection after each use on patients. Overall, less than a fifth  
201 (13.9%) of the physicians disinfect their stethoscopes after every use, as needed; and a quarter (25.59%) of the  
202 respondents uttered that they have never disinfected their stethoscopes. This trend is similar to the antecedent  
203 studies done in different countries [4,8,36-38]. Despite empirical observation denoted the use of sanitizers and  
204 alcohol-based solutions in disinfecting non-critical medical equipments and other contaminated surfaces, and this  
205 had been ubiquitous in every corner of the globe. The present disturbingly low disinfection practice among  
206 physicians raises a concern in this unprecedented global crisis of coronavirus disease 2019 (COVID-19). As the  
207 person-to-person transmission of novel coronavirus has been outlined in the hospital settings [39], consistent and  
208 correct stethoscope disinfection should be observed after each use on patients [5,40], Upholding to the core  
209 values of nonmaleficence, physicians should be more diligent in providing safe domains for their patients.

210 To our cognizance, no specific guidelines solely on stethoscopes disinfection are available to date. The novelty of  
211 this pandemic – along with its uncertainties – makes it critical for health authorities to develop appropriate  
212 disinfection regulations to keep the safety for both patients and clinicians in the countenance of the current  
213 COVID-19 pandemic. The oft-cited Healthcare Infection Control Practices Advisory Committee (HICPAC) and  
214 Centers for Disease Control and Prevention (CDC) guidelines, advocating for non-critical medical equipment,  
215 such as stethoscopes, should be disinfected once daily or weekly [29]. The above standards might not be  
216 reflective on the current danger that a contaminated stethoscope may feasibly jeopardize patients' and  
217 physicians' safety – given the survival potential of coronavirus to thrive on different surfaces for an extended

218 period of time [32]. It has been reported that SARS-CoV-2 can survive on steel and plastic surfaces for 72 hours  
219 or more [41]. Additionally, stethoscopes have high usage for assessment of COVID-19 patients [42, 43], and  
220 should be disinfected following each usage.

221 During times of increased uncertainties, technological advancements in the area of single-use aseptic diaphragm  
222 barriers provide a promising result for stethoscope hygiene [44]. Messina et al also propounded the utilization of  
223 pocket-held UV-LED devices which would be attached on the stethoscope diaphragms which will provide  
224 automatic disinfection of the stethoscope membranes [45]. On the downside, Alali et al connoted that despite the  
225 use of alcohol-based cleaner for stethoscope hygiene, physicians were ill-fated in eradicating all pathogenic  
226 microorganisms [46].

227 Often times, dialogues surrounding disinfections tend to focus only on critical equipment used for invasive  
228 procedures, like gastrointestinal endoscopes. However, essential medical equipment is easily neglected – such  
229 as non-infrared thermometers – but these can be prime sources of infection transmissions. In an early report,  
230 thermometers are linked to the outbreak of hospital-acquired infections [47, 48]. Until today, in most resource  
231 limited-settings, surveillance for body temperatures using non-contact digital thermometers are still shortly  
232 supplied, and the use of non-infrared thermometers are withal customary – often assumed sanitary, unless visibly  
233 soiled. Interestingly, our study corroborated that only a fifth of the physicians disinfected thermometers after every  
234 use, and a significant number of them (40.53%) never disinfected their thermometers at all. This finding has  
235 paramount implications in combating COVID-19, as contamination of routinely used devices in the healthcare  
236 settings are the possible sources of infections [32, 33]. A systematic review on the relationship between shared  
237 patient care items and healthcare-associated infections manifested that potential pathogens and multiple resistant  
238 organisms present on noninvasive portable clinical items (NPIs) in routine, non-outbreak conditions – and in a  
239 variety of settings affirms the need to improve NPIs decontamination practices [49].

240 In multivariable analyses, stethoscope disinfections after every use were significantly associated with the  
241 availability of the disinfectants in the workplaces. Previous studies also identified deficiencies on access to  
242 disinfection materials as potential barriers to stethoscope disinfections after every use [8]. In resource-limited  
243 settings, physicians often rely on clinical appraisals using the stethoscope, particularly the assessment of  
244 respiratory dysfunctions in COVID-19 positive patients [42], and eventually, these can cause the contagion of  
245 physicians and patients. Considering the communicability of the virus, the use of ultrasound is now recommended

246 by Buonsenso et al as essential in the safe management of the COVID-19 pandemic; après it can allow the  
247 concomitant execution of clinical examination and lung imaging at the bedside by the same doctor [43]. However,  
248 in resource-limited settings, this may not be applicable. It is, therefore, of utmost importance that ensuring the  
249 availability of disinfectant solutions may precede a positive influence on disinfection compliance. Patel et al also  
250 argued that, at this point, it is difficult to answer if the stethoscope is a necessary tool or an unnecessary evil  
251 during COVID-19 pandemic, but removing it altogether from the care of patients with COVID-19 does not seem  
252 practical. And suggested basic guiding principles such as use of personal stethoscopes, use disposable isolation  
253 stethoscope and cleaning of stethoscope after patient auscultation with predefined stethoscope cleaning protocols  
254 [50].

255 Furthermore, providing trainings are beneficial, and thus significantly increases the odds of disinfection after every  
256 use – as confirmed from this study. The present study identified that the odds of stethoscope disinfection after  
257 every use were significantly reduced among those who reported the use of shared stethoscopes. In our point of  
258 view, sharing stethoscopes are detrimental, and may pose risks to physicians. Similar conclusions about the  
259 sharing of personal items have been described by WHO [34]. The researchers also believe that, if unavoidably  
260 stethoscopes are shared, it is paramount to disinfect the stethoscopes meticulously. Lastly, another fact but not of  
261 utmost significance, access to disinfectants in the workplaces (AOR 1.67; 95%CI: 0.88-3.16) increase the odds of  
262 non-infrared thermometer disinfections after ever use. In contrast, studies reported a positive correlation between  
263 availability of instructive posters and acceptable decontamination practice among healthcare workers [51-52].

## 264 *Limitations*

265 This study has a number of limitations. First, recall bias may have affected our results. Second, external validation  
266 survey responses regarding direct observation on the physician's disinfection practices were not executed. Third,  
267 the potential for social desirability biases among survey respondents are present, although the low reported  
268 stethoscope and non-infrared thermometer disinfections after ever use suggest that responses may not reflect the  
269 physicians' actual behaviors. Fourth, the cross-sectional nature of the survey does not allow the cause-and-effect  
270 relationship between the dependent and independent variables. Fifth, the sample size was conducted into  
271 account the proportion of stethoscope disinfection practice but not for the associations of this disinfection practice,

272 so in some cases, the power of the sample may not sufficient. And finally, this study should be generalizable for  
273 the physicians working in the healthcare facilities of this country.

## 274 **CONCLUSIONS**

275 In summary, less than a fifth of the physicians disinfected their stethoscopes after every use, and a significant  
276 number of respondents reported that they have never disinfected their non-infrared thermometers. This study has  
277 reflected disturbing inadequate disinfection practices among physicians, whereby patient safety is of germane  
278 priority in the era of COVID-19. In this regard, physicians should be exigent and more vigilant in disinfecting these  
279 commonly used medical devices. Furthermore, this study provides empirical evidence on the association between  
280 the availability of disinfectants in the working units, and stethoscope disinfection after every use. With respect,  
281 measures should be taken by health authorities in upraising the current practices of disinfection through  
282 implementations of simple interventions, such as provisions of training and securing constant and available  
283 disinfection supplies.

### 284 **Conflict of interest statement**

285 None declared

### 286 **Funding Sources**

287 None

## References

1. Livshiz-Riven I, Borer A, Nativ R, Eskira S, Larson E. Relationship between shared patient care items and healthcare-associated infections: a systematic review. *International journal of nursing studies*. 2015 ;52(1):380-92.
2. Sahiledengle B. Stethoscope disinfection is rarely done in Ethiopia: What are the associated factors?. *PloS one*. 2019 ;14(6):e0208365.
3. O'flaherty N, Fenelon L. The stethoscope and healthcare-associated infection: a snake in the grass or innocent bystander?. *Journal of Hospital Infection*. 2015 ;91(1):1-7.
4. Longtin Y, Schneider A, Tschopp C, Renzi G, Gayet-Ageron A, Schrenzel J, Pittet D. Contamination of stethoscopes and physicians' hands after a physical examination. *In Mayo Clinic Proceedings 2014*; 89(3): 291-299.
5. Knecht VR, McGinniss JE, Shankar HM, Clarke EL, Kelly BJ, Imai I, Fitzgerald AS, Bittinger K, Bushman FD, Collman RG. Molecular analysis of bacterial contamination on stethoscopes in an intensive care unit. *Infection Control & Hospital Epidemiology*. 2019;40(2):171-7.
6. Tang PH, Worster A, Srigley JA, Main CL. Examination of staphylococcal stethoscope contamination in the emergency department (pilot) study (EXSSCITED pilot study). *Canadian Journal of Emergency Medicine*. 2011;13(4):239-44.
7. Thom J, Saito GK, Wei Y, Gnanasuntharam P, McGeer A, Willey BM, Loftus M, Borgundvaag B. Stethoscope contamination with Methicillin-resistant *Staphylococcus Aureus* (MRSA) in an inner-city emergency department. *Canadian Journal of Infection Control*. 2014.
8. Muniz J, Sethi RK, Zaghi J, Ziniel SI, Sandora TJ. Predictors of stethoscope disinfection among pediatric health care providers. *American journal of infection control*. 2012;40(10):922-5.
9. Bhatta DR, Gokhale S, Ansari MT, Tiwari HK, Gaur A, Mathuria JM, Ghosh AN. Stethoscopes: a possible mode for transmission of nosocomial pathogens. *J Clin Diagn Res* 2011;5:1173-1176
10. Bukharie HA, Al-Zahrani H, Rubaish AM, Abdulmohsen MF. Bacterial contamination of stethoscopes. *Journal of family & community medicine*. 2004;11(1):31.
11. Alleyne SA, Hussain AM, Clokie M, Jenkins DR. Stethoscopes: potential vectors of *Clostridium difficile*. *Journal of Hospital Infection*. 2009 ;73(2):187-9.
12. Sanders S. The stethoscope and cross-infection revisited. *British Journal of General Practice*. 2005 ;55(510):54-5.
13. Cohen HA, Amir J, Matalon A, Mayan R, Beni S, Barzilai A. Stethoscopes and otoscopes--a potential vector of infection?. *Family practice*. 1997;14(6):446-9.
14. Maluf ME, Maldonado AF, Bercial ME, Pedroso SA. Stethoscope: a friend or an enemy?. *Sao Paulo Medical Journal*. 2002;120(1):13-5.
15. Schroeder A, Schroeder MA, D' Amico F. What' s growing on your stethoscope? And what you can do about it. *J Fam Pract*. 2009;58:404-9.

16. Williams C, Davis DL. Methicillin-resistant *Staphylococcus aureus* fomite survival. *American Society for Clinical Laboratory Science*. 2009;22(1):34-8.
17. Madar R, Novakova E, Baska T. The role of non-critical health-care tools in the transmission of nosocomial infections. *Bratislavske lekarske listy*. 2005;106(11):348.
18. Lange CG, Morrissey AB, Donskey CJ. Point-Prevalence of Contamination of Healthcare Workers' Stethoscopes With Vancomycin-Resistant Enterococci at Two Teaching Hospitals in Cleveland, Ohio. *Infection Control & Hospital Epidemiology*. 2000;21(12):756.
19. Zachary KC, Bayne PS, Morrison VJ, Ford DS, Silver LC, Hooper DC. Contamination of gowns, gloves, and stethoscopes with vancomycin-resistant enterococci. *Infection Control & Hospital Epidemiology*. 2001;22(9):560-4.
20. Youngster I, Berkovitch M, Heyman E, Lazarovitch Z, Goldman M. The stethoscope as a vector of infectious diseases in the paediatric division. *Acta Paediatrica*. 2008;97(9):1253-5.
21. Hudson H. Stethoscopes and infection control: a study into the use of stethoscopes in a paediatric ward and their possible contamination. *Journal of child health care: for professionals working with children in the hospital and community*. 2003;7(2):142.
22. Nunez S, Moreno A, Green K, Villar J. The stethoscope in the emergency department: a vector of infection?. *Epidemiology & Infection*. 2000;124(2):233-7.
23. Huang R, Mehta S, Weed D, Price CS. Methicillin-resistant *Staphylococcus aureus* survival on hospital fomites. *Infection Control & Hospital Epidemiology*. 2006;27(11):1267-9.
24. Wolfensberger A, Clack L, Kuster SP, Passerini S, Mody L, Chopra V, Mann J, Sax H. Transfer of pathogens to and from patients, healthcare providers, and medical devices during care activity—a systematic review and meta-analysis. *Infection Control & Hospital Epidemiology*. 2018;39(9):1093-107.
25. Uneke CJ, Ijeoma PA. The potential for transmission of hospital-acquired infections by non-critical medical devices: the role of thermometers and blood pressure cuffs. *World health & population*. 2011;12(3):5-12.
26. Worku T, Derseh D, Kumalo A. Bacterial profile and antimicrobial susceptibility pattern of the isolates from stethoscope, thermometer, and inanimate surfaces of Mizan-Tepi University Teaching Hospital, Southwest Ethiopia. *International journal of microbiology*. 2018 ;2018.
27. Sued BP, Pereira PM, Faria YV, Ramos JN, Binatti VB, Santos KR, Seabra SH, Hirata Júnior R, Vieira VV, Mattos-Guaraldi AL, Pereira JA. Sphygmomanometers and thermometers as potential fomites of *Staphylococcus haemolyticus*: biofilm formation in the presence of antibiotics. *Memórias do Instituto Oswaldo Cruz*. 2017;112(3):188-95.
28. Available at : <https://www.albertahealthservices.ca/assets/healthinfo/ipc/hi-ipc-covid-19-therm-visitor.pdf>
29. Rutala WA, Weber DJ. Guideline for disinfection and sterilization in healthcare facilities, 2008.
30. Vajravelu RK, Guerrero DM, Jury LA, Donskey CJ. Evaluation of stethoscopes as vectors of *Clostridium difficile* and methicillin-resistant *Staphylococcus aureus*. *Infection Control & Hospital Epidemiology*. 2012;33(1):96-8.

31. Blydt-Hansen T, Subbarao K, Quennec P, McDonald J. Recovery of respiratory syncytial virus from stethoscopes by conventional viral culture and polymerase chain reaction. *The Pediatric infectious disease journal*. 1999 ;18(2):164-5.
32. Kampf G, Todt D, Pfaender S, Steinmann E. Persistence of coronaviruses on inanimate surfaces and their inactivation with biocidal agents . *J Hosp Infect*. 104(3): 246-251.
33. WHO. Preparedness, prevention and control of COVID-19 in prisons and other places of detention Interim guidance. 15 March 2020. Available at:  
[https://www.euro.who.int/\\_data/assets/pdf\\_file/0019/434026/Preparedness-prevention-and-control-of-COVID-19-in-prisons.pdf?ua=1](https://www.euro.who.int/_data/assets/pdf_file/0019/434026/Preparedness-prevention-and-control-of-COVID-19-in-prisons.pdf?ua=1)
34. Infection prevention and patient safety reference manual for service providers and managers in healthcare facilities of Ethiopia. Federal Ministry of Health Ethiopia. 2<sup>nd</sup> ed. Addis Ababa, 2012.
35. Available at : [https://apps.who.int/gho/data/node.main.HWFGRP\\_0020?lang=en](https://apps.who.int/gho/data/node.main.HWFGRP_0020?lang=en)
36. Vasudevan RS, Mojaver S, Chang KW, Maisel AS, Peacock WF, Chowdhury P. Observation of stethoscope sanitation practices in an emergency department setting. *American journal of infection control*. 2019 ;47(3):234-7.
37. Saunders C, Hryhorskyj L, Skinner J. Factors influencing stethoscope cleanliness among clinical medical students. *Journal of Hospital Infection*. 2013 ;84(3):242-4.
38. Ghumman GW, Ahmad N, Pop-Vicas A, Iftikhar S. Stethoscope cleaning during patient care. *Rhode Island Medical Journal*. 2018;101(4):18-20.
39. Chan JF, Yuan S, Kok KH, To KK, Chu H, Yang J, Xing F, Liu J, Yip CC, Poon RW, Tsoi HW. A familial cluster of pneumonia associated with the 2019 novel coronavirus indicating person-to-person transmission: a study of a family cluster. *The Lancet*. 2020;395(10223):514-23.
40. Scott-Rimington B, Klim S, Kelly AM. How clean is your stethoscope?. *Emergency medicine Australasia: EMA*. 2017;29(1):122.
41. Van Doremalen N, Bushmaker T, Morris DH, Holbrook MG, Gamble A, Williamson BN. & Lloyd-Smith, JO (2020). Aerosol and surface stability of SARS-CoV-2 as compared with SARS-CoV-1. *N Engl J Med*. 2020;382(16):1564-1567. <https://doi.org/10.1056/NEJMc2004973>
42. Vasudevan RS, Horiuchi Y, Torriani FJ, Cotter B, Maisel SM, Dadwal SS, Gaynes R, Maisel AS. Persistent Value of the Stethoscope in the Age of COVID-19. *The American journal of medicine*. 2020. doi: <https://doi.org/10.1016/j.amjmed.2020.05.018>.
43. Buonsenso D, Pata D, Chiaretti A. COVID-19 outbreak: less stethoscope, more ultrasound. *The Lancet Respiratory Medicine*. 2020 ;8(5):e27.
44. Schmidt MG, Tuuri RE, Dharsee A, Attaway HH, Fairey SE, Borg KT, Salgado CD, Hirsch BE. Antimicrobial copper alloys decreased bacteria on stethoscope surfaces. *American Journal of Infection Control*. 2017;45(6):642-7. <https://doi.org/doi:10.1016/j.ajic.2017.01.030>

45. Messina G, Burgassi S, Messina D, Montagnani V, Cevenini G. A new UV-LED device for automatic disinfection of stethoscope membranes. *Am J Infect Control*. 2015;43(10):e61-e66. <https://doi.org/doi:10.1016/j.ajic.2015.06.019>
46. Alali SA, Shrestha E, Kansakar AR, Parekh A, Dadkhah S, Peacock WF. Community hospital stethoscope cleaning practices and contamination rates. *American Journal of Infection Control*. 2020 .1-5.
47. Van den Berg RW, Claahsen HL, Niessen M, Muijtjens HL, Liem K, Voss A. Enterobacter cloacae outbreak in the NICU related to disinfected thermometers. *Journal of Hospital Infection*. 2000;45(1):29-34.
48. Donkers LE, Van Furth AM, Van Der Zwet WC, Fetter WP, Roord JJ, Vandenbroucke-Grauls CM. Enterobacter cloacae epidemic on a neonatal intensive care unit due to the use of contaminated thermometers. *Nederlands tijdschrift voor geneeskunde*. 2001 ;145(13):643-7.
49. Livshiz-Riven I, Borer A, Nativ R, Eskira S, Larson E. Relationship between shared patient care items and healthcare-associated infections: a systematic review. *International journal of nursing studies*. 2015 ;52(1):380-92.
50. Patel L, Gandhi D, Beddow D, Controversies on the Stethoscope during COVID-19: A Necessary Tool or An Unnecessary Evil?, *The American Journal of the Medical Sciences* (2020). <https://doi.org/10.1016/j.amjms.2020.07.006>
51. Sahiledengle B, Gebresilassie A, Getahun T, Hiko D. Infection prevention practices and associated factors among healthcare workers in governmental healthcare facilities in Addis Ababa. *Ethiop J Health Sci*. 2018;28(2):177–86.
52. Sahiledengle B. Decontamination of patient equipment: nurses' self-reported decontamination practice in hospitals of southeast Ethiopia. *BMC research notes*. 2019;12(1):392.



**Table I: Socio-Demographic Characteristics of the Study Participants**

| Variables                           | Category                             | n    | %     |
|-------------------------------------|--------------------------------------|------|-------|
| Profession                          | Medical doctor <sup>a</sup>          | 265  | 62.80 |
|                                     | Specialist medical practitioners     | 142  | 33.65 |
|                                     | Resident physician                   | 15   | 3.55  |
| Gender                              | Male                                 | 368  | 87.20 |
|                                     | Female                               | 54   | 12.80 |
| Age                                 | 20-25                                | 44   | 10.43 |
|                                     | 26-30                                | 228  | 54.03 |
|                                     | 31-35                                | 107  | 25.36 |
|                                     | 36-40                                | 35   | 8.29  |
|                                     | 40+                                  | 8    | 1.90  |
| Service year                        | 1-3                                  | 238  | 56.40 |
|                                     | 4-6                                  | 97   | 22.90 |
|                                     | 7-9                                  | 37   | 8.77  |
|                                     | 10+                                  | 50   | 11.85 |
| Training on COVID-19                | Yes                                  | 107  | 25.36 |
|                                     | No                                   | 315  | 74.64 |
| Current working healthcare facility | Governmental                         | 388  | 91.94 |
|                                     | Private                              | 35   | 8.06  |
| Department                          | Surgical                             | 113  | 26.78 |
|                                     | Outpatient Department (OPD)          | 106  | 25.12 |
|                                     | Medical                              | 47   | 11.14 |
|                                     | Gynecology and Obstetrics Department | 37   | 8.77  |
|                                     | Operation Room (OR)                  | 32   | 7.58  |
|                                     | Emergency (E-OPD)                    | 31   | 7.35  |
|                                     | Pediatric Department                 | 29   | 6.87  |
|                                     | COVID-19 Center                      | 14   | 3.32  |
|                                     | Intensive Care Unit (ICU)            | 6    | 1.42  |
|                                     | Pathology Department                 | 2    | 0.47  |
|                                     | Radiology Department                 | 2    | 0.47  |
|                                     | Psychiatric Department               | 1    | 0.24  |
|                                     | Orthopedic Department                | 1    | 0.24  |
| Urology Department                  | 1                                    | 0.24 |       |

<sup>a</sup>including medical interns

**Table II: Stethoscopes Disinfection Practices and Physicians Perceptions**

| Variables                                                                                                                | Category                                   | n   | %     |
|--------------------------------------------------------------------------------------------------------------------------|--------------------------------------------|-----|-------|
| Stethoscope ownership                                                                                                    | Yes/my own                                 | 340 | 80.57 |
|                                                                                                                          | Yes/shared                                 | 82  | 19.43 |
| How often do you disinfect your stethoscope ?*                                                                           | After every use                            | 59  | 13.98 |
|                                                                                                                          | Monthly                                    | 13  | 3.08  |
|                                                                                                                          | Multiple times per day not after every use | 26  | 6.16  |
|                                                                                                                          | Multiple times per week but not every day  | 34  | 8.06  |
|                                                                                                                          | Never disinfect                            | 108 | 25.59 |
|                                                                                                                          | Once a week or less often                  | 42  | 9.95  |
|                                                                                                                          | Once or twice a day                        | 29  | 6.87  |
|                                                                                                                          | Only after seeing high-risk patients       | 111 | 26.30 |
| Disinfected stethoscope after the last patient?                                                                          | Yes                                        | 121 | 28.67 |
|                                                                                                                          | No                                         | 254 | 60.19 |
|                                                                                                                          | I don't remember                           | 47  | 11.14 |
| Which part/s of the stethoscope do you frequently disinfect? (n=324)                                                     | Diaphragm                                  | 128 | 39.51 |
|                                                                                                                          | Diaphragm, tubing, and earpieces           | 92  | 28.40 |
|                                                                                                                          | Diaphragm and earpieces                    | 77  | 23.77 |
|                                                                                                                          | Earpieces                                  | 25  | 7.72  |
|                                                                                                                          | Plastic tubing                             | 2   | 0.62  |
| Average duration of stethoscope disinfection (n=273) ,<br>Mean (SD): 22.76 (± 21.46)<br>Range: (2-120 Second)            | <20                                        | 142 | 52.01 |
|                                                                                                                          | ≥ 20                                       | 131 | 47.99 |
| Stethoscopes used on intact skin should be disinfected between each patient?                                             | Yes                                        | 70  | 16.59 |
|                                                                                                                          | No                                         | 352 | 83.41 |
| As in the case of skin that is not intact (e.g., trauma), stethoscopes should be disinfected before use on each patient? | Agree                                      | 411 | 97.39 |
|                                                                                                                          | Disagree                                   | 3   | 0.71  |
|                                                                                                                          | Not sure                                   | 8   | 1.90  |
| Do stethoscopes need to be disinfected after every use?                                                                  | Agree                                      | 378 | 89.57 |
|                                                                                                                          | Disagree                                   | 18  | 4.27  |
|                                                                                                                          | Not sure                                   | 26  | 6.16  |
| Stethoscopes can contribute to the transmission of COVID-19 if not disinfected after every use?                          | Agree                                      | 384 | 91.00 |
|                                                                                                                          | Disagree                                   | 1   | 0.24  |
|                                                                                                                          | Not sure                                   | 37  | 8.77  |
| Are there any reminders about medical equipment disinfection in your working unit? (e.g. poster)                         | Yes                                        | 70  | 16.59 |
|                                                                                                                          | No                                         | 352 | 83.41 |
| Do you have a disinfectant solution in your working unit ? ( e.g. alcohol, alcohol-based sanitizer,..)                   | Yes                                        | 302 | 71.56 |
|                                                                                                                          | No                                         | 120 | 28.44 |
| How often are you involved in direct contact with a known case of COVID-19 patient? (n=411)                              | Daily                                      | 91  | 21.56 |
|                                                                                                                          | Never/ not yet                             | 331 | 78.44 |

\* Practice of disinfection was specific time during the COVID-19 pandemic.

**Table III: Factors Associated with Stethoscope Disinfection among Physicians**

| Variables                                                                                        | Category                             | Disinfect after every use (%) | COR (95%CI)       | p-value | AOR (95%CI)        |
|--------------------------------------------------------------------------------------------------|--------------------------------------|-------------------------------|-------------------|---------|--------------------|
| Gender                                                                                           | Male                                 | 56 (94.9)                     | 1                 |         | 1                  |
|                                                                                                  | Female                               | 3 (5.1)                       | 0.32(0.09-1.08)   | 0.06    | 0.32(0.09-1.14)    |
| Age                                                                                              | ≤30                                  | 47 (79.7)                     | 2.40(1.23-4.68)*  | 0.01    | 2.52(1.10-5.78)**  |
|                                                                                                  | >30                                  | 12 (20.3)                     | 1                 |         | 1                  |
| Service year                                                                                     | 1-3                                  | 32 (54.2)                     | 1                 |         |                    |
|                                                                                                  | 3+                                   | 27 (45.8)                     | 1.12(0.63-1.92)   | 0.72    |                    |
| Training on COVID-19                                                                             | Yes                                  | 24 (40.7)                     | 2.31(1.30-4.11)*  | 0.004   | 2.52(1.29-4.92)**  |
|                                                                                                  | No                                   | 35 (59.3)                     | 1                 |         | 1                  |
| Profession                                                                                       | Medical doctor                       | 38 (64.4)                     | 1                 |         | 1                  |
|                                                                                                  | Specialist medical practitioners     | 15 (25.4)                     | 0.70(0.37-1.33)   | 0.28    | 0.97(0.41-2.31)    |
|                                                                                                  | Resident physician                   | 6 (10.2)                      | 3.98(1.34-11.82)* | 0.01    | 4.61(1.29-16.52)** |
| Current working healthcare facility                                                              | Governmental                         | 57 (96.6)                     | 2.75(0.64-11.82)  | 0.17    | 2.24(0.47-10.62)   |
|                                                                                                  | Private                              | 2 (3.4)                       | 1                 |         | 1                  |
| Department                                                                                       | OPD & Emergency                      | 17 (28.8)                     | 1                 |         | 1                  |
|                                                                                                  | Surgical Department & OR             | 19 (32.2)                     | 1.06(0.53-2.14)   | 0.86    | 1.01(0.42-2.46)    |
|                                                                                                  | Medical Department                   | 4 (6.8)                       | 0.66(0.21-2.06)   | 0.47    | 0.57(0.17-1.94)    |
|                                                                                                  | Gynecology and Obstetrics Department | 6 (10.2)                      | 1.36(0.49-3.75)   | 0.54    | 1.27(0.38-4.26)    |
|                                                                                                  | Pediatric Department                 | 5 (8.5)                       | 1.47(0.49-4.37)   | 0.48    | 1.02(0.29-3.52)    |
|                                                                                                  | COVID-19 Center                      | 7 (11.9)                      | 7.05(2.20-22.61)* | 0.001   | 3.11(0.84-11.50)   |
|                                                                                                  | Intensive Care Unit (ICU) & others   | 1 (1.7)                       | 0.59(0.07-4.81)   | 0.62    | 0.32(0.03-3.12)    |
| Ownership of stethoscope                                                                         | My own                               | 54 (91.5)                     | 1                 |         | 1                  |
|                                                                                                  | Shared                               | 5 (8.5)                       | 0.34(0.13-0.89)*  | 0.02    | 0.34(0.12-0.92)**  |
| Availability of disinfectant in the work place                                                   | Yes                                  | 50 (84.7)                     | 2.44(1.16-5.14)*  | 0.01    | 3.03(1.29-7.10)**  |
|                                                                                                  | No                                   | 9 (15.3)                      | 1                 |         | 1                  |
| Are there any reminders about medical equipment disinfection in your working unit? (e.g. poster) | Yes                                  | 17 (28.8)                     | 2.37 (1.25-4.46)* | 0.008   | 1.62(0.78-3.36)    |
|                                                                                                  | No                                   | 42 (71.2)                     | 1                 |         | 1                  |
| Stethoscopes used on intact skin should be disinfected between each patient?                     | Yes                                  | 57 (96.6)                     |                   |         |                    |
|                                                                                                  | No                                   | 2 (3.4)                       |                   |         |                    |
| Duration of stethoscope disinfection                                                             | <20 seconds                          | 26 (52.0)                     | 0.99(0.54-1.84)   | 0.99    |                    |
|                                                                                                  | ≥ 20 seconds                         | 24 (48.0)                     | 1                 |         |                    |
| How often are you involved in direct contact with a known case of COVID-19 patient?              | Daily                                | 20 (33.9)                     | 2.10(1.16-3.83)*  | 0.01    | 1.22(0.60-2.47)    |
|                                                                                                  | Never/not yet                        | 39 (66.1)                     | 1                 |         | 1                  |

Hosmer-Lemeshow = 0.7992; Crude odds ratio: COR ; Adjusted odds ratio: AOR; \*p-value < 0.05 (Crude); \*\*p-value < 0.05 (Adjusted)

**Table IV: Factors Associated with Non-Infrared Thermometer Disinfection**

| Variables                                                                                        | Category                             | Disinfect after every use (%) | COR (95%CI)       | p-value | AOR (95%CI)        |
|--------------------------------------------------------------------------------------------------|--------------------------------------|-------------------------------|-------------------|---------|--------------------|
| Gender                                                                                           | Male                                 | 69 (80.2)                     | 1                 |         | 1                  |
|                                                                                                  | Female                               | 17(19.8)                      | 1.99(1.06-3.74)*  | 0.03    | 2.21(1.12-4.36)**  |
| Age                                                                                              | ≤30                                  | 55 (63.9)                     | 0.97(0.59-1.59)   | 0.49    | 1.29(0.69-2.39)    |
|                                                                                                  | >30                                  | 31 (36.1)                     | 1                 |         | 1                  |
| Service year                                                                                     | 1-3                                  | 43 (50.0)                     | 1                 |         | 1                  |
|                                                                                                  | 3+                                   | 43 (50.0)                     | 1.38(0.86-2.22)   | 0.18    | 1.13(0.64-2.01)    |
| Training on COVID-19                                                                             | Yes                                  | 27 (31.4)                     | 1.46(0.87-2.46)   | 0.15    | 1.59(0.90-2.81)    |
|                                                                                                  | No                                   | 59 (68.6)                     | 1                 |         |                    |
| Profession                                                                                       | Medical doctor                       | 44 (51.2)                     | 1                 |         | 1                  |
|                                                                                                  | Specialist medical practitioners     | 34 (39.5)                     | 1.58(0.95-2.61)   | 0.07    | 1.60(0.86-2.99)    |
|                                                                                                  | Resident physician                   | 8 (9.3)                       | 5.74(1.97-16.64)* | 0.001   | 7.10(2.30-21.95)** |
| Current working healthcare facility                                                              | Governmental                         | 74 (86.1)                     | 0.43(0.20-0.91)*  | 0.02    | 0.48(0.22-1.08)    |
|                                                                                                  | Private                              | 12 (13.9)                     | 1                 |         | 1                  |
| Department                                                                                       | OPD & Emergency                      | 27 (31.4)                     | 1                 |         |                    |
|                                                                                                  | Surgical Department & OR             | 23 (26.7)                     | 0.76(0.41-1.41)   | 0.39    |                    |
|                                                                                                  | Medical Department                   | 14 (16.3)                     | 1.72(0.81-3.67)   | 0.15    |                    |
|                                                                                                  | Gynecology and Obstetrics Department | 6 (6.9)                       | 0.79(0.29-2.08)   | 0.63    |                    |
|                                                                                                  | Pediatric Department                 | 8 (9.3)                       | 1.55(0.62-3.88)   | 0.38    |                    |
|                                                                                                  | COVID-19 Center                      | 6 (6.9)                       | 3.05(0.97-9.54)   | 0.06    |                    |
|                                                                                                  | Intensive Care Unit (ICU) & others   | 2 (2.3)                       | 0.74(0.15-3.54)   | 0.71    |                    |
| Availability of disinfectants in the workplace                                                   | Yes                                  | 70 (81.4)                     | 2.96(1.08-3.54)*  | 0.02    | 1.67(0.88-3.16)    |
|                                                                                                  | No                                   | 16 (18.6)                     | 1                 |         | 1                  |
| Are there any reminders about medical equipment disinfection in your working unit? (e.g. poster) | Yes                                  | 21 (24.4)                     | 1.89 (1.06-3.37)* | 0.03    | 1.78(0.95-3.32)    |
|                                                                                                  | No                                   | 65 (75.6)                     | 1                 |         | 1                  |
| How often are you involved in direct contact with a known case of COVID-19 patient?              | Daily                                | 20 (23.3)                     | 1.13(0.64-1.98)   | 0.66    | 0.95(0.51-1.76)    |
|                                                                                                  | Never/not yet/                       | 66 (76.7)                     | 1                 |         | 1                  |

Hosmer-Lemeshow = 0.1631; Crude Odds Ratio: COR; Adjusted Odds Ratio: AOR; \*p-value < 0.05 (Crude); \*\*p-value < 0.05 (Adjusted)

## Figure Legends

**Figure 1:** Bar graph showing percentage of reported obstacles to stethoscope disinfection among physicians during COVID-19

**Figure 2:** Bar graph showing percentage of non-Infrared thermometer disinfection during COVID-19 during COVID-19

## Appendices

### Table A.1: Physicians' Non-Infrared Thermometer Disinfection

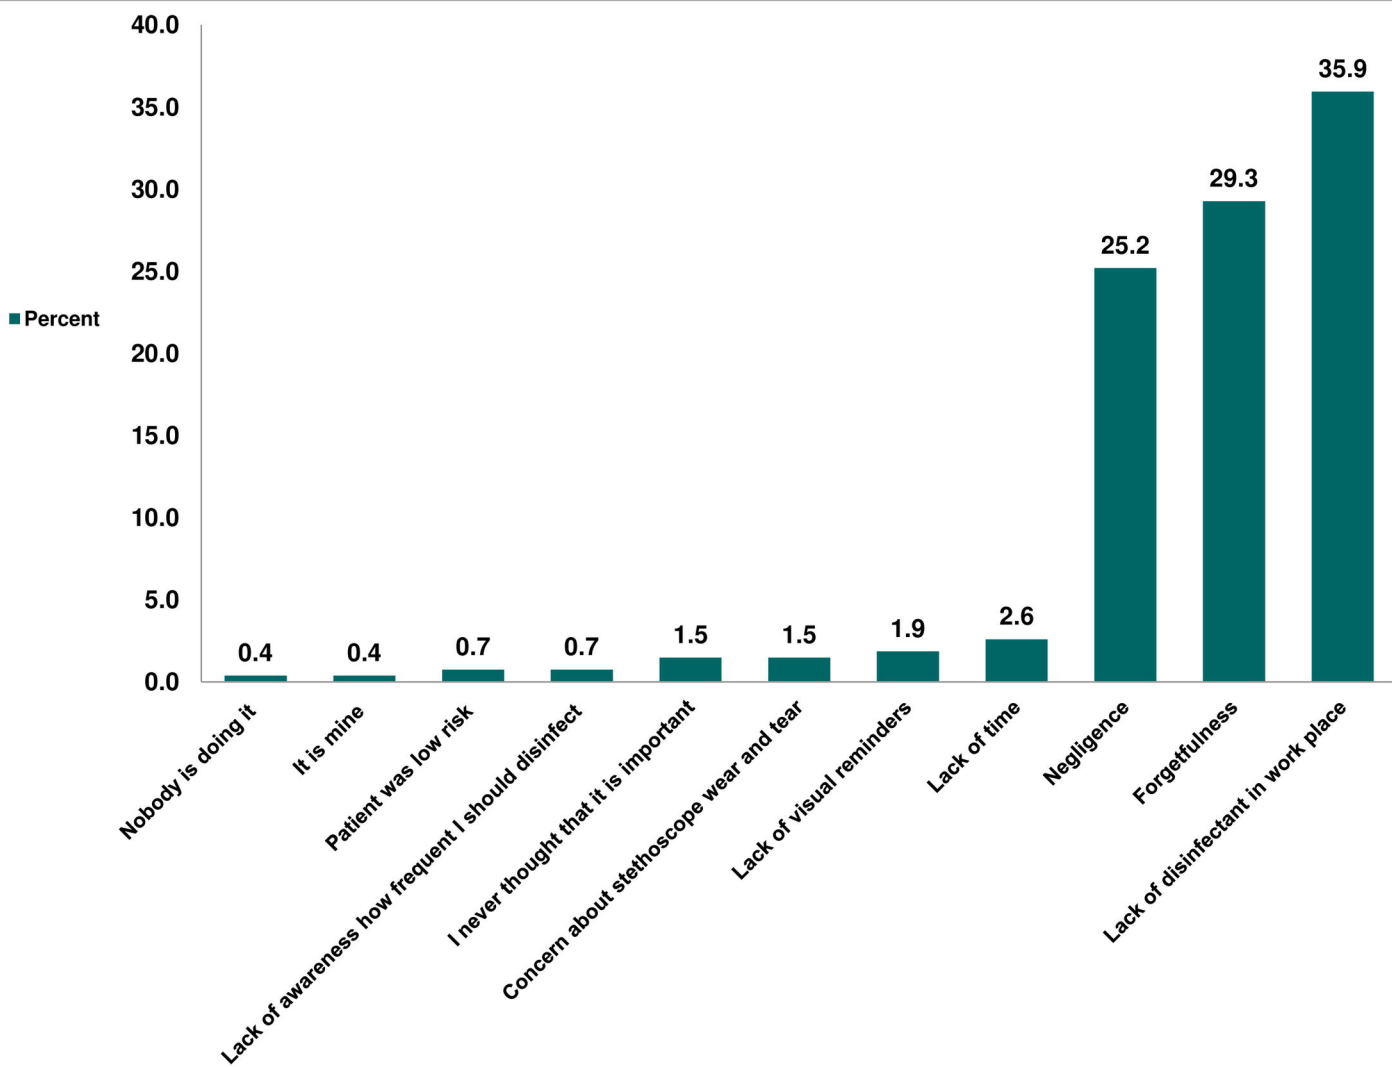

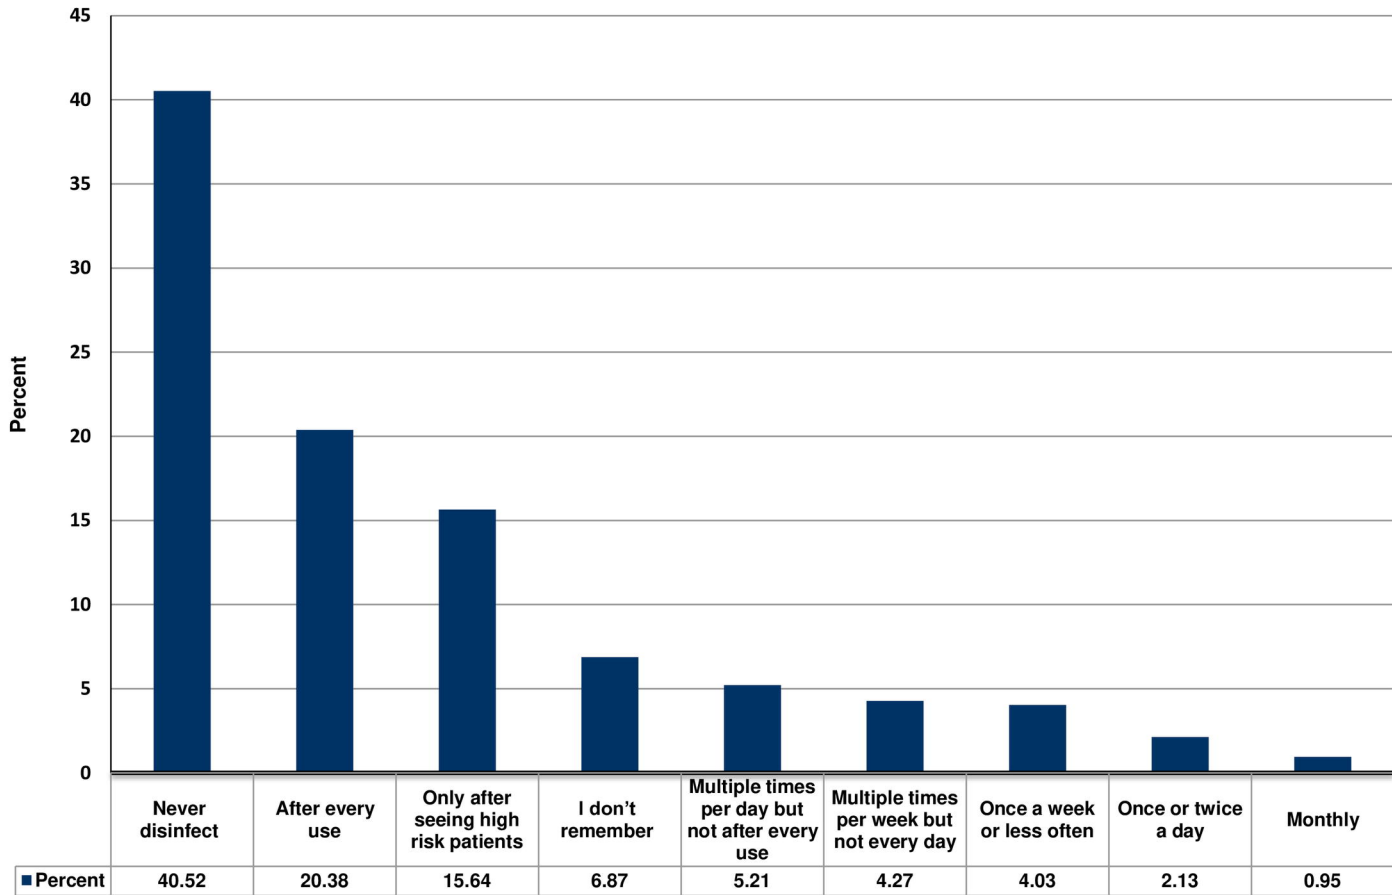

Source: https://www.medrxiv.org/content/10.1101/2020.08.14.20174433v2.full.pdf
